# Supplementary material
Source: publisher figshare collection journal article supplement (https://gsajournals.figshare.com/ndownloader/files/25920018)
Supplement: Supplementary file 1 [file 25920018]

## Sheet: Sheet1
Table S2. Thomson et al.
Oligo	Oligo name	Sequence
4304	SOU1_Tet_for	ATAAAGAACTTTTTTTGTGTAATAATGGAGCATATACAATAGATTTTAAAGCCAATTTGCTACTATTATTTATTGGATGGGAAACAGCTATGACCATG
4305	SOU1_Tet_rev	ACATTTGATGGTAATTGTGGAGCTTTTGTTGGTAATGGACCTAAAGCAGGATTTGTAAATGAAATGATTTCTTCACTCATCGACTATTTATATTTGTATG
Oligonucleotides used in this study.
